# Supplementary material for: Confounding Environmental Colour and Distribution Shape Leads to Underestimation of Population Extinction Risk
Source: PubMed Central journal article supplement (PMC3569452; doi:10.1371/journal.pone.0055855), 2013-02-11

1/f model

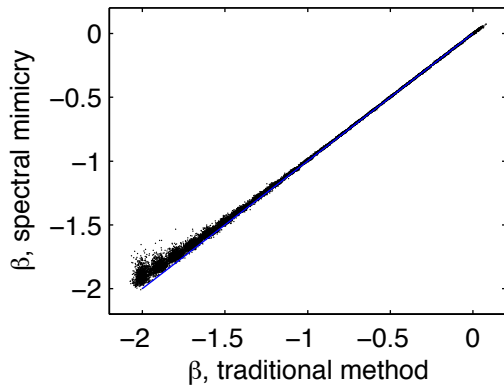

AR(1) model

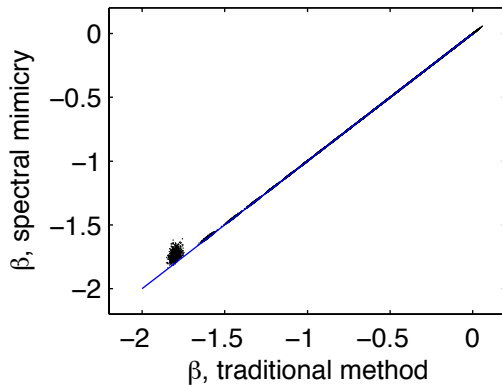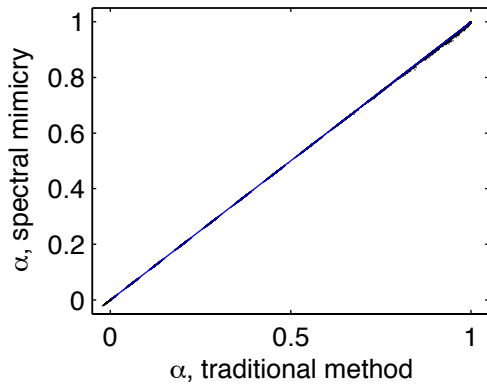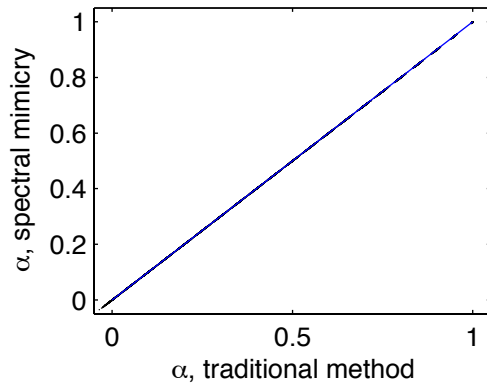

Supplement: pone.0055855.s002.pdf [file pone.0055855.s002.pdf]
