# Supplementary material for: Confounding Environmental Colour and Distribution Shape Leads to Underestimation of Population Extinction Risk
Source: PubMed Central journal article supplement (PMC3569452; doi:10.1371/journal.pone.0055855), 2013-02-11

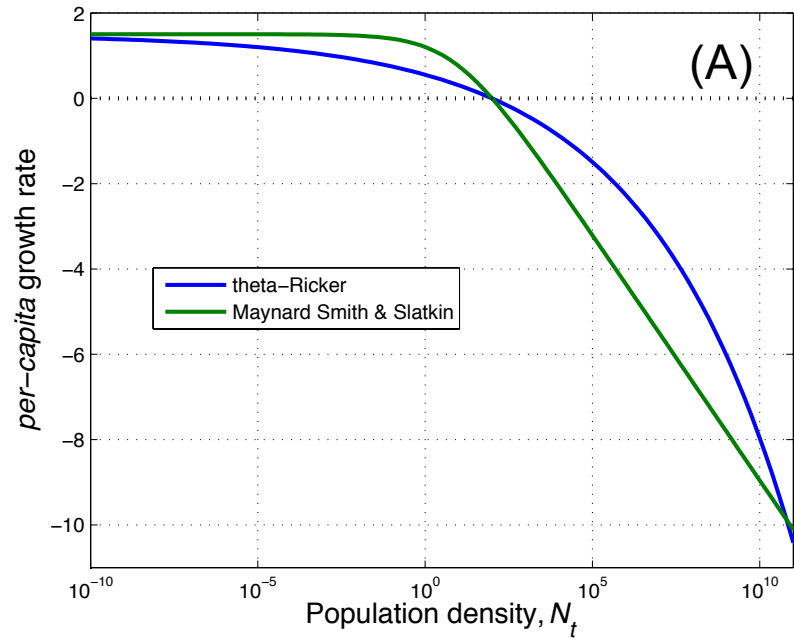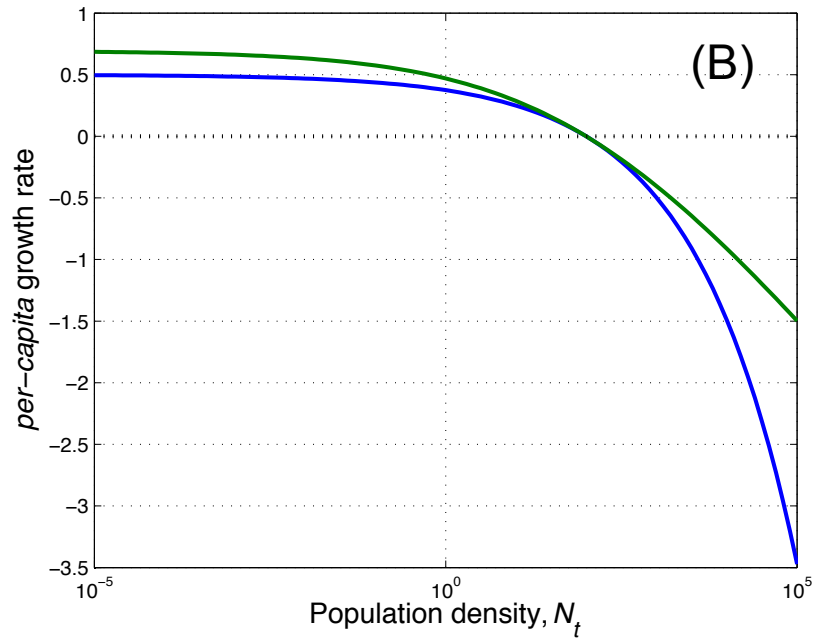

Supplement: pone.0055855.s004.pdf [file pone.0055855.s004.pdf]
